# Supplementary material for: Association of Blast Exposure in Military Breaching with Intestinal Permeability Blood Biomarkers Associated with Leaky Gut
Source: MDPI journal article supplement (doi:10.3390/ijms25063549), 2024-03-21
Supplement: s1 [file s1]

| Pre-post           |               |               | Pre-followup  |               |
|--------------------|---------------|---------------|---------------|---------------|
|                    | Spearman<br>r | p             | Spearman<br>r | p             |
| Alpha<br>diversity | -0.0684       | 0.7813        | -0.3175       | 0.185         |
| Zonulin            | 0.2966        | 0.247         | 0.0686        | 0.7947        |
| LBP                | 0.4923        | <b>0.0398</b> | <b>0.7564</b> | <b>0.0004</b> |
| Claudin3           | 0.2962        | 0.232         | -0.226        | 0.3656        |
| I-FABP             | 0.1702        | 0.4979        | 0.1765        | 0.4821        |

**Table S1.** Correlations between alpha-diversity and IP biomarker change from pre to post and followup with cumulative blast exposure measured in peak pressure (psi) \* time (ms),with corresponding significance reported.

| symptom   | project      | case/tot<br>al | pre-<br>post_mean_sd_ca<br>se | pre-<br>post_mean_sd_cont<br>rol | pre-<br>post_cohe<br>n     | pre-<br>follow_mean_sd_c<br>ase | pre-<br>follow_mean_sd_cont<br>rol | pre-<br>follow_coh<br>en |
|-----------|--------------|----------------|-------------------------------|----------------------------------|----------------------------|---------------------------------|------------------------------------|--------------------------|
| headache  | alpha        | 16/30          | 0.0427 (0.6055)               | 0.1564 (0.5153)                  | -0.201<br>(small)          | 0.2721 (0.6364)                 | 0.124 (0.6917)                     | 0.223<br>(small)         |
|           | zonulin      | 14/22          | 1.1974 (1.6473)               | 1.3275 (2.0654)                  | -0.072<br>(negligible<br>) | 0.954 (1.6076)                  | 1.8361 (1.8286)                    | -0.523<br>(medium)       |
|           | lbp          | 15/24          | -1.8617 (3.3232)              | -1.0881 (2.7425)                 | -0.248<br>(small)          | 0.8061 (3.5807)                 | 1.9689 (2.9081)                    | -0.347<br>(small)        |
|           | claudin<br>3 | 15/24          | -3.4096 (3.2147)              | -2.714 (3.274)                   | -0.215<br>(small)          | -2.2727 (2.8112)                | -1.0025 (3.9167)                   | -0.39 (small)            |
|           | ifabp        | 15/24          | 9.285 (86.8141)               | -3.7389 (50.757)                 | 0.172<br>(negligible<br>)  | 51.7331 (77.5267)               | 99.8699 (70.7096)                  | -0.641<br>(medium)       |
| longthink | alpha        | 12/30          | -0.0061 (0.5332)              | 0.1637 (0.5797)                  | -0.302<br>(small)          | 0.1641 (0.7646)                 | 0.229 (0.594)                      | -0.097<br>(negligible)   |

|               |       |                   |                   |                     |                   |                    |                    |
|---------------|-------|-------------------|-------------------|---------------------|-------------------|--------------------|--------------------|
| zonulin       | 11/22 | 1.7371 (1.437)    | 0.7523 (1.9809)   | 0.569 (medium)      | 0.8922 (1.5514)   | 1.6573 (1.8351)    | -0.45 (small)      |
|               | 11/24 | -1.5367 (2.7482)  | -1.6011 (3.4472)  | 0.02 (negligible)   | 0.1899 (3.2837)   | 2.1324 (3.2204)    | -0.598 (medium)    |
| claudin 3     | 11/24 | -3.4471 (4.0118)  | -2.8963 (2.4222)  | -0.17 (negligible)  | -2.5503 (3.0328)  | -1.1584 (3.4024)   | -0.43 (small)      |
|               | 11/24 | 7.4382 (88.775)   | 1.8311 (63.2986)  | 0.074 (negligible)  | 33.0698 (68.2858) | 100.8507 (72.5572) | -0.959 (large)     |
| concentration | alpha | 8/30              | 0.2981 (0.6308)   | 0.0222 (0.5263)     | 0.498 (small)     | 0.2819 (0.8835)    | 0.1743 (0.5743)    |
|               | 8/30  | 0.2981 (0.6308)   | 0.0222 (0.5263)   | 0.498 (small)       | 0.2819 (0.8835)   | 0.1743 (0.5743)    | 0.162 (negligible) |
| zonulin       | 5/22  | 1.8162 (2.0463)   | 1.0766 (1.7022)   | 0.416 (small)       | 1.6501 (1.63)     | 1.1644 (1.7576)    | 0.28 (small)       |
|               | 5/24  | -1.9488 (2.5422)  | -1.4723 (3.2609)  | -0.152 (negligible) | -0.5383 (3.1656)  | 1.7107 (3.2885)    | -0.689 (medium)    |
| claudin 3     | 5/24  | -4.5792 (4.6941)  | -2.7724 (2.709)   | -0.571 (medium)     | -3.3161 (2.9033)  | -1.3964 (3.2841)   | -0.597 (medium)    |
|               | 5/24  | 49.2902 (86.4709) | -7.4119 (68.4927) | 0.786 (medium)      | 50.5683 (37.1332) | 74.8413 (84.7645)  | -0.31 (small)      |
| dizziness     | alpha | 9/30              | -0.0526 (0.8091)  | 0.1593 (0.42)       | -0.379 (small)    | 0.2588 (0.8186)    | 0.1791 (0.594)     |
|               | 9/30  | -0.0526 (0.8091)  | 0.1593 (0.42)     | -0.379 (small)      | 0.2588 (0.8186)   | 0.1791 (0.594)     | 0.12 (negligible)  |
| zonulin       | 7/22  | 1.4128 (1.8046)   | 1.1663 (1.8006)   | 0.137 (negligible)  | 1.4496 (1.6216)   | 1.1932 (1.7903)    | 0.147 (negligible) |
|               | 7/24  | -1.7 (2.9141)     | -1.5187 (3.231)   | -0.058 (negligible) | 0.5315 (2.6784)   | 1.5347 (3.5945)    | -0.298 (small)     |
| claudin 3     | 7/24  | -4.3759 (4.0453)  | -2.6435 (2.7396)  | -0.55 (medium)      | -2.4964 (2.8123)  | -1.5081 (3.4473)   | -0.301 (small)     |
|               | 7/24  | 35.8016 (73.0228) | -8.5286 (73.0326) | 0.607 (medium)      | 38.3837 (45.3616) | 82.7141 (84.8115)  | -0.582 (medium)    |

**Table S2.** Association of changes in self-reported symptoms vs. changes in alpha-diversity and IP biomarkers, shown as effect sizes

measured by Cohen's  $d$ . For each elevated symptom self-reported, participants were assigned to either of two groups i.e., increasing vs. non-increasing by comparing the symptom scales reported at pre vs. post and pre vs. follow-up per subject. Then the increasing vs. the non-increasing groups by symptom were compared for differences in alpha-diversity and levels of IP biomarkers (separately) across timepoints (specifically post - pre and follow-up - pre). Mean and standard deviation of alpha-diversity and biomarkers for each group are reported along with the effect size.
